# Supplementary material
Source: HighWire-hosted journal article supplement (http://rc.rcjournal.com/highwire/filestream/16302/field_highwire_adjunct_files/0/suppl.pdf)
Supplement: suppl.pdf [file suppl.pdf]

## **Part 1: The survey instrument**

### **Water pipe Use History and Prevalence:**

This section will ask you about water pipe use (also called hookah, shisha, narghile, or the hubbly bubbly) experiences. Please only tell us about your water pipe experiences using TOBACCO and not any other non-tobacco products like marijuana.

**1. Have you EVER used a waterpipe to smoke tobacco (even one or two puffs)?**

- No (please skip to question #6)
- Yes (please continue to question 2)

**2. Which of the following choices best describes how often you smoke tobacco using a water pipe?**

- Less than once a year
- At least once a year, but not monthly
- At least once a month, but not weekly
- At least once a week, but not daily
- At least once a day, or most days each month

**3. How old were you when you FIRST used a water pipe to smoke tobacco?**

- Younger than 9 years' old
- 10-12 years old
- 13-15 years old
- 16-18 years old
- 19-21 years old
- 22-24 years old
- 25-29 years old
- 30 years old or older

**4. Who were you with when you FIRST used a waterpipe to smoke tobacco? (check all that apply)?**

- No one, I was alone
- With one friend
- With more than one friend
- With a family member
- With more than one family member
- With a new acquaintance

**5. Where were you when you FIRST used a water pipe to smoke tobacco?**

- In a cafe or restaurant
- In my own home (apartment, condo, house)
- In my own dorm room
- At a family member's home
- At a fraternity/sorority house
- At a friend's or acquaintance's home
- In someone else's dorm room

AWESOME!! thanks for sticking with us! Keep going

**Knowledge of a water pipe smoking among College Based Health professional students:**

This section will ask about your knowledge about water pipe smoking:

6. **Which among these do you identify as important health hazards of *Shisha/Hookah* (water-pipe) smoking?** (You may choose more than one response if applicable)

- Cancer
- Respiratory problems
- Cardiovascular impairments
- Hematologic Impairments
- Pregnancy Hazards
- Diarrhea

7. **Which among Cigarette and *Shisha/Hookah* are more addictive according to your perception?**

- Shisha/Hookah* (water-pipe) smoking is more addictive
- Cigarette smoking is more addictive
- Both are equally addictive

8. **Where do you rate the health hazards of habitual *Shisha/Hookah* (water-pipe) smoking in comparison to those of cigarette smoking?** (If you choose 1, please answer question 9, and If you choose 2 or 3, please skip question 9 continue to attitude section)

- 1. Cigarette smoking is more harmful
- 2. Water-pipe smoking is more harmful
- 3. Both are equal in terms of health risks

**Beliefs of hookah smoking among College Based Health professional students:**

9. **Why do you think habitual *Shisha/Hookah* (water-pipe) smoking is less hazardous than habitual cigarette smoking?** (You can choose more than one answer)

- Water-pipes have an efficient filtration mechanism
- The fruit flavor in water-pipe detoxifies the smoke
- The amount of cancerous substances is lesser in water-pipe smoke
- The amount of Nicotine is lesser in water-pipe smoke
- Chain smokers consume more than 20 cigarettes per day but even habitual hookah (*Shisha*) smokers practice it not more than once daily
- Water-pipe smoking is less irritating and thus less toxic to the respiratory tract.

**Attitudes of hookah smoking among College Based Health professional students:**

This section will ask about your attitudes and opinions regarding water pipe smoking:

10. For each statement given under please indicate where do you place *Shisha/Hookah* (water-pipe) smoking using the scale below:

|                                                      | I do not agree at all | I somewhat agree | I agree | I strongly agree |
|------------------------------------------------------|-----------------------|------------------|---------|------------------|
| It is a safe habit                                   |                       |                  |         |                  |
| It is a good stress-coping strategy                  |                       |                  |         |                  |
| Makes one look attractive                            |                       |                  |         |                  |
| Makes one look relaxed                               |                       |                  |         |                  |
| Sign of high social status                           |                       |                  |         |                  |
| Shows the person is adventurous                      |                       |                  |         |                  |
| Adds intimacy among persons from opposite sex        |                       |                  |         |                  |
| It is more acceptable than cigarettes                |                       |                  |         |                  |
| Females cannot smoke cigarettes but can smoke hookah |                       |                  |         |                  |

11. In Your opinion, what are the main reason/s behind the current surge of *Shisha/Hookah* popularity in US? (You may choose more than one response if applicable)

- Boredom in youth
- Availability of free time to the youth
- Lack of other entertainment sources
- Existing high prevalence of cigarette smoking
- Utility of *Shisha/Hookah* in leisure & pleasure activities
- Flavor/aroma of *Shisha/Hookah* itself
- Influence of immigrants
- Stressful life and need for relaxation
- Increased availability (cafes etc.)
- Ignorance
- Peer pressure

## Part 2: Demographic Questionnaire

Please Mark the suitable number or fill in where requested:

**1. How old are you?**

- |                                          |                                          |
|------------------------------------------|------------------------------------------|
| <input type="checkbox"/> 18-25 years old | <input type="checkbox"/> 31-39 years old |
| <input type="checkbox"/> 26-30 years old | <input type="checkbox"/> ≥40 years old   |

**2. What is your gender?**

- Male
- Female

**3. Which of the following best describes your education status?**

- |                                                                                           |                                                           |
|-------------------------------------------------------------------------------------------|-----------------------------------------------------------|
| <input type="checkbox"/> First Year in the program<br>undergraduate students<br>(Junior)  | <input type="checkbox"/> First year graduate students     |
| <input type="checkbox"/> Second year in the program<br>undergraduate students<br>(Senior) | <input type="checkbox"/> Second year graduate<br>students |

**4. Educational profession:**

- |                                               |                                              |
|-----------------------------------------------|----------------------------------------------|
| <input type="checkbox"/> Nursing              | <input type="checkbox"/> Physical Therapy    |
| <input type="checkbox"/> Nutrition            | <input type="checkbox"/> Respiratory Therapy |
| <input type="checkbox"/> Occupational Therapy |                                              |

**5. Which of these groups best describes you? (Choose only ONE answer)**

- Alaska Native
- Asian
- African American
- Hispanic or Latino
- Native Hawaiian or Other Pa-  
cific Islander
- White
- American Indian
- Middle Eastern
